# Supplementary material for: Ontogeny in the tube-crested dinosaur Parasaurolophus (Hadrosauridae) and heterochrony in hadrosaurids
Source: PeerJ journal article supplement (doi:10.7717/peerj.182), 2013-10-22

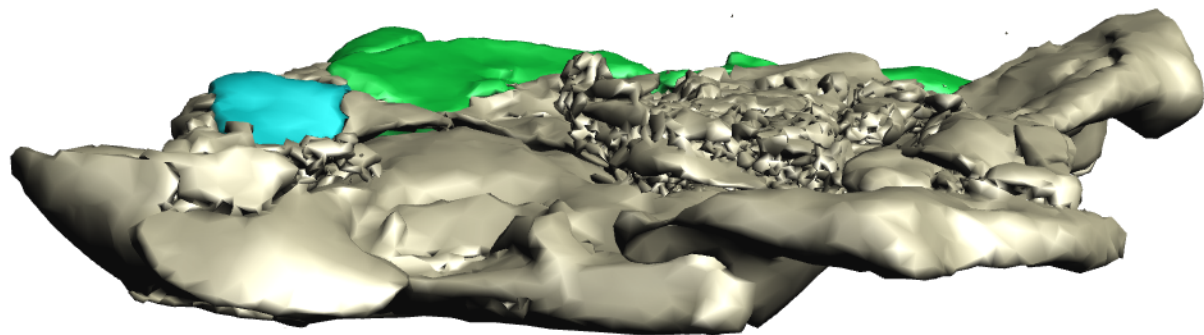

Supplement: SuppFigS1.pdf [file SuppFigS1.pdf]
